# Supplementary material for: The Association Between Employment Status and Timely Initiation of Infant Complementary Feeding Practice in Addis Zemen Town, Ethiopia, 2018.
Source: Research Square preprint supplement (doi:10.21203/rs.3.rs-156425/v1), 2021-02-04
Supplement: Supplementary file 1 [file f98e0984fbf0990da4f3b445.docx]

**English version questionnaire:**

|  | **Part I: Socio-Demographic Characteristics of Mothers** | | | |
| --- | --- | --- | --- | --- |
| **No** | **Questions** | **Classifications** | | Remark |
| 101 | How old are you | Age in years ______________ | |  |
| 102 | To which ethnic group do you belong? | 1.Amhara  2. Oromo  3. Tigre  4. Others ________ | |  |
| 103 | What is your religion? | 1.Orthodox  2. Muslim  3.Protestant  4. Catholic   1. 5. Others specify ____________ | |  |
| 104 | Head of the HH | 1. Male  2. Female | |  |
| 105 | What is your current marital Status? | 1. Single  2. Married  3. Divorced  4. Widowed  5. Other specify---------------------------- | |  |
| 106 | Educational status of mother | 1. 1. unable to read & write 2. 2. able to read & write 3. 3. primary school (1-8) 4. 4. secondary school (9-12) 5. 5. certificate & above | |  |
| 107 | Educational status of father | 1. 1. unable to read & write 2. 2. able to read & write 3. 3. primary school (1-8) 4. 4. secondary school (9-12) 5. 5. certificate & above | |  |
| 108 | current occupation of mother | 1.Merchant  2. daily labor  3. House wife  4.Student  5. Government employee  6. NGO employee   1. 7. Other (Specify) ……… | |  |
| 109 | Occupation of father | 1.Merchant  2. Farmer  3. Daily labor  4. Student  5. Government employee  6. NGO employee  7. Other (Specify)……… | |  |
| 110 | Average Household income per month( in ETB birr) | 1. 1. <1000 2. 2. 1001-2000 3. 3. 2001-3000 4. 4. 3001-4000 5. 5. above 4000 | |  |
| 111 | Household size | 1. ( ------------- ) number | |  |
| 112 | sex of index child | 1. 1. Male 2. Female | |  |
| 113 | Age of child in Months | 1. 1. 6-8 months 2. 2. 9-11 months 3. 3. 12-23 months | |  |
| 114 | How many children do you have | (--------------- )number | |  |
| 115 | Do you have radio or TV in your house ? | 1. yes  2. no | |  |
| **Part II: Maternal health care related Practices** | | | | |
| 201 | For how many times did you visit health facility for ANC during pregnancy? | | ------------------------- |  |
| 202 | Did you get health education on infant feeding at any of your ANC visit | | 1. yes 2. No |  |
| 203 | What was the information that you acquired during your visit | | 1. 1. continued breast feeding even during maternal or child illness 2. 2. breast feeding should be inciated with in 1 hr 3. 3. EBF should be practiced for the 1st 6 months 4. 4. breast feeding should continuous until two years 5. 5. Complementary feeding initiated at age of 6 month | More than one answer is possible |
| 204 | Where did you give birth to this child ?Place of Child birth | | 1. 1. Home 2. 2. Hospital 3. 3. Health center 4. 4. health post 5. 5. private clinic 6. 6. Other ……………… |  |
| 205 | Mode of Delivery the child | | 1. Spontaneous vaginal delivery 2. Cesarean section 3. assisted instrumental delivery 4. other------------------------------- |  |
| 206 | Birth order of this child in the family ( the subject child for this interview) | | ----------------------- (in number) |  |
| 207 | Birth interval between this child and his or her immediate elder ( the subject child for this interview) | | 1. ----------------------- (in number) |  |
| 208 | Where did you get health extension workers in the last 6 months ? | | 1. health post  2. vaccination site  3. home visiting  4. community meeting  5. growth monitoring  6. training  7.others specify............................... |  |
| 209 | How many times did you get health extension workers in the last 6 months ? | | ------------------------- (in number) |  |
| 210 | Do you have PNC visit | | 1. 1. Yes 2. No |  |
| **Part III**: Infant & child Feeding Practices( use lottery method for twin children,& use small child if two children in one house hold is study subject) | | | | |
|  |  |  |
| 301 | Are you still breast feed? | | 1. 1. Yes   2. No | If no skip to 304 |
| 302 | What was the age of index child when you stopped breast feeding | | 1. **_______**days 2. **_______**months |  |
| 303 | Why did you stop breast feeding for the child | | 1. breast feeding takes too much time 2. Fear of loss of beauty 3. Mother sick/Weak 4. started using contraceptive 5. Child sick/Weak 6. Breast Nipple Problem 7. Not enough milk 8. Child refused 9. Weaning age/age to stop 10. Mother return to work 11. Mother got pregnant 12. Child develops Tooth 13. Other (Specify)……………… |  |
| 304 | For how many months did you feed this child with breast milk only? ( the subject child for this interview) | | **_______**days  **_______**months |  |
| 305 | Starting from yesterday , what do you feed your youngest child | | 1. Only Breast milk 2. Water/tea 3. Sugar solution 4. Cow’s milk 5. Cereal based fluid 6. Formula milk 7. Other(Specify--------------- |  |
| 306 | At what age did you first start complementary feeding your index child (semi-solid or solid) other than breast milk to the baby? | | 1. < 6months 2. 6 months( from 6 to 7 month) 3. >7 months |  |
| 307 | How many times did you feed solid and/or semi-solid food between sunrise yesterday and sunrise today? | | 1. 1. Not at all 2. 2. Once 3. 3. Two times 4. 4. Three times 5. 5. Four times 6. 6. More than Four times per day |  |
| 308 | Do you feed left over food and overnight food for your child? | | 1. 1. Yes 2. 2. No |  |
| **Part IV**: Knowledge of mother about Infant & child Feeding | | | | |
| 401 | What is appropriate complementary feeding | | - 1. Initiation of Solid or semi-solid food at age of 6 month   2. Initiation of Solid or semi-solid food before 6 month whenever he/she fill hunger   3. Initiation of Solid or semi-solid food after 6 month whenever he/she fill hunger   4. Other sissify……………… |  |
| 402 | Eating of a Varity of food is best to ensure quality of physical and mental growth? | | 1. 1. Yes 2. 2. No |  |
| 403 | Why do you started complementary feeding for the child ? | | 1. Right time to weaning 2. Return to work 3. Others(specify)………….......... |  |
| 404 | Delayed initiation of complementary feeding cause malnutrition on the child? | | 1. 1. Yes 2. 2. No |  |
| 405 | Do you wash your hand by soap prior to cooking and feeding? | | 1. 1. Yes 2. 2. No |  |
| 406 | When did you restrict your infants’ diet? | | 1. No restriction 2. During Diarrheal illness 3. During malaria illness 4. During headache 5. Other specify------------- |  |
| 407 | What is the benefit of initiating complementary feeding to the child at 6 months and continuous to two years? | | 1. helps a child to develop and grow strong and healthy 2. It has no significant benefit to the child to develop and grow strong and healthy 3. Other ---------------------------- |  |
| 408 | Early initiation of complementary feeding cause adverse health effect to the child. | | 1. Yes 2. No |  |
| 409 | Complementary feeding time should starts at 6 months of age & continued up to 2 yrs with breast feeding. | | 1. Yes 2. No |  |
| **Part V**: Attitude of mother about Infant & child Feeding | | | | |
| 501 | To which sex do you think timely and appropriate complementary feeding is important? | | ------------------------------- |  |
| 502 | Do you think starting complementary feeding at six month of age results more faces/diarrhea to the child ? | | 1. Strongly agree 2. Agree 3. Neutral 4. Disagree 5. Strongly disagree |  |
| 503 | Do you agree that starting complementary feeding at six month of age results vomiting to the child ? | | 1. Strongly agree 2. Agree 3. Neutral 4. Disagree 5. Strongly disagree |  |
| 504 | Do you think starting complementary feeding at six month of age induce illness to the child ? | | 1. Strongly agree 2. Agree 3. Neutral 4. Disagree 5. Strongly disagree |  |
| 505 | Do you agree starting complementary feeding at six month of age benefit the child ? | | 1. Strongly agree 2. Agree 3. Neutral 4. Disagree 5. Strongly disagree |  |
| 506 | Do you think that feeding homemade foods can possess important nutrients to the child at six month of age? | | 1. Strongly agree 2. Agree 3. Neutral 4. Disagree 5. Strongly disagree |  |
| 507 | Do you agree that complementary feeding should continuous during child illness? | | 1. Strongly agree 2. Agree 3. Neutral 4. Disagree 5. Strongly disagree |  |
| 508 | Do you agree that fruits and vegetables are important as complementary food after 6 month of age. | | 1. Strongly agree 2. Agree 3. Neutral 4. Disagree 5. Strongly disagree |  |

**Thank You!**
